# Supplementary material for: Highly efficient electrochemical reduction of carbon dioxide to formate on Sn modified Bi2O3 heterostructure
Source: Royal Society of Chemistry journal article supplement (doi:10.1039/d1dt02586d), 2021-01-01
Supplement: d1dt02586d1.pdf [file d1dt02586d1.pdf]

## Supporting Information

### **Highly Efficient Electrochemical Reduction of Carbon Dioxide to Formate on Sn Modified Bi<sub>2</sub>O<sub>3</sub> Heterostructure**

*Doufeng Wu, Pengzuo Chen, Dongmei Feng, Jiajia Song and Yun Tong\**

Department of Chemistry, Key Laboratory of Surface & Interface Science of Polymer Materials of Zhejiang Province, Zhejiang Sci-Tech University, Hangzhou 310018, China

Correspondence and requests for materials should be addressed to Y. Tong (E-mail: tongyun@mail.ustc.edu.cn)

## Table of contents

|                                                                                                                                                                                                                                                                                                                                                     |    |
|-----------------------------------------------------------------------------------------------------------------------------------------------------------------------------------------------------------------------------------------------------------------------------------------------------------------------------------------------------|----|
| <b>Experimental Section</b> .....                                                                                                                                                                                                                                                                                                                   | 3  |
| <b>Figure S1</b> The a) XRD pattern and b) TEM image of $\text{Bi}_2\text{O}_2\text{CO}_3$ precursor. ....                                                                                                                                                                                                                                          | 5  |
| <b>Figure S2</b> The a) XRD pattern and b) TEM image of pristine $\text{Bi}_2\text{O}_3$ sample.....                                                                                                                                                                                                                                                | 5  |
| <b>Figure S3</b> The TEM images of $\text{Sn}_L\text{-Bi}_2\text{O}_3$ and $\text{Sn}_H\text{-Bi}_2\text{O}_3$ samples. ....                                                                                                                                                                                                                        | 6  |
| <b>Figure S4</b> The elemental mapping images of $\text{Sn}_L\text{-Bi}_2\text{O}_3$ product.....                                                                                                                                                                                                                                                   | 6  |
| <b>Figure S5</b> The elemental mapping images of $\text{Sn}_H\text{-Bi}_2\text{O}_3$ product. ....                                                                                                                                                                                                                                                  | 7  |
| <b>Figure S6</b> The CV curves vs scan rates for a) $\text{Sn}_L\text{-Bi}_2\text{O}_3$ , b) $\text{Sn}_M\text{-Bi}_2\text{O}_3$ and c) $\text{Sn}_H\text{-Bi}_2\text{O}_3$ catalysts. d) The $C_{dl}$ values for $\text{Sn}_L\text{-Bi}_2\text{O}_3$ , $\text{Sn}_M\text{-Bi}_2\text{O}_3$ and $\text{Sn}_H\text{-Bi}_2\text{O}_3$ catalysts. .... | 8  |
| <b>Figure S7</b> The EIS spectra of $\text{Sn}_L\text{-Bi}_2\text{O}_3$ , $\text{Sn}_M\text{-Bi}_2\text{O}_3$ and $\text{Sn}_H\text{-Bi}_2\text{O}_3$ . ....                                                                                                                                                                                        | 9  |
| <b>Figure S8</b> The a) XRD pattern and b) TEM image of $\text{Sn}_M\text{-Bi}_2\text{O}_3$ sample after $\text{CO}_2$ electrolysis.....                                                                                                                                                                                                            | 9  |
| <b>Figure S9</b> The XRD pattern of $\text{SnO}_2$ sample.....                                                                                                                                                                                                                                                                                      | 10 |
| <b>Figure S10</b> The TEM and HRTEM images of $\text{SnO}_2$ sample.....                                                                                                                                                                                                                                                                            | 10 |
| <b>Figure S11</b> The elemental mapping images of $\text{SnO}_2$ sample.....                                                                                                                                                                                                                                                                        | 11 |
| <b>Figure S12</b> The partial current density of formate at different potential of $\text{SnO}_2$ , $\text{Sn}_M\text{-Bi}_2\text{O}_3$ and $\text{Bi}_2\text{O}_3$ catalysts. ....                                                                                                                                                                 | 12 |
| <b>Figure S13</b> The CV curves vs scan rates for a) $\text{SnO}_2$ and b) $\text{Bi}_2\text{O}_3$ catalysts. ....                                                                                                                                                                                                                                  | 12 |
| <b>Figure S14</b> The XPS survey of $\text{Sn-Bi}_2\text{O}_3$ catalyst. ....                                                                                                                                                                                                                                                                       | 13 |

## Experimental Section

**The synthesis of  $\text{Bi}_2\text{O}_2\text{CO}_3$  precursor and  $\text{Bi}_2\text{O}_3$  samples:** All chemicals are analytical grade and used without further treatment. In a typical procedure, 2g  $\text{Bi}(\text{NO}_3)_3 \cdot 5\text{H}_2\text{O}$  (Sigma, ACS reagent,  $\geq 98.0\%$ ) is dissolved into 20 ml dilute  $\text{HNO}_3$  solution (1 M) under sonication condition. Then, above solution is gradually dropped into 80 ml of  $\text{Na}_2\text{CO}_3$  (Sigma,  $\geq 99.0\%$ ) aqueous solution (0.6 M) under constant stirring. During this process, a large amounts of white precipitate is formed. Next, the above solution is kept at 60 °C for 6h. Finally, the white products are collected by centrifugation, and washed by water and ethanol for several times before putting into vacuum oven for dry. Then, the  $\text{Bi}_2\text{O}_3$  sample is prepared by annealing the  $\text{Bi}_2\text{O}_2\text{CO}_3$  precursor at furnace under 450 °C in air for 3min. The final yellow samples are taken out and kept for further characterizations.

**The synthesis of Sn modified  $\text{Bi}_2\text{O}_3$  and  $\text{SnO}_2$  samples:** Typically, 30 mg  $\text{Bi}_2\text{O}_3$  sample is firstly dispersed in 10 ml acetone solution by sonication treatment. Then, the above solution is heated to 55 °C under constant stirring. Next, different amount of stannous chloride (Aldrich,  $\geq 99.99\%$ ) and 0.1g tartaric acid (Alfa Aesar, 99%) are added into above solution. Tin disproportionates in the presence of a tartaric acid. The reaction is kept for 20 min under stirring, the final product can be obtained after it's collected by centrifugation and washed by acetone for several times. The usage of stannous chloride are 0.05, 0.1 and 0.15 mmol to prepare the  $\text{Sn}_L\text{-Bi}_2\text{O}_3$ ,  $\text{Sn}_M\text{-Bi}_2\text{O}_3$  and  $\text{Sn}_H\text{-Bi}_2\text{O}_3$  products, respectively. The simple  $\text{SnO}_2$  nanoparticle is prepared by hydrothermal reaction. Typically, 400 mg  $\text{SnCl}_4 \cdot 5\text{H}_2\text{O}$  are put into a mixed solution of 2-propanol (60 ml) and water (20 ml). Then, the solution is adjusted to pH 12 by adding NaOH solution and transferred to autoclave. The reaction is kept for 12 h at 130 °C. The final powders are collected and washed by water and ethanol solutions.

## Structural Characterization

X-ray powder diffraction (XRD) was presented using a Philips X'Pert Pro Super diffractometer with Cu-K $\alpha$  radiation ( $\lambda = 1.54178 \text{ \AA}$ ). The transmission electron microscopy (TEM) was conducted on a HT-7700 field-emission electron microscope operated at an acceleration voltage of 120 kV. The high-resolution TEM (HRTEM) and corresponding energy-dispersive spectroscopy (EDS) mapping analyses were executed on a JEOL JEM-ARF200F TEM/STEM. X-ray photoelectron spectroscopy (XPS) measurements were performed on a PHI5000 Versa Probe II

XPS system by Physical Electronics (PHI) with a detection limit of 1 atomic percent. Monochromatic X-rays were generated by an Al K $\alpha$  source (1,4867 eV). The diameter of the analyzed area is 10  $\mu\text{m}$ .

### **Electrochemical Measurements**

The electrochemical tests are performed in a gas-tight H-cell with membrane (Nafion 117) on an electrochemical workstation (CHI660B). The Ag/AgCl electrode (saturated KCl), Pt foil and catalysts coated carbon paper are used as reference electrode, counter electrode and working electrode, respectively. Typically, 4 mg of as-prepared sample is dispersed in a mixed solution of 40  $\mu\text{L}$  Nafion and 960  $\mu\text{L}$  ethanol. The solution is kept sonication for 30 min and the catalyst ink is further drop-casted onto a carbon paper. The mass loading of catalyst is about 1 mg  $\text{cm}^{-2}$ . The test electrolyte is 0.5 M  $\text{KHCO}_3$  solution. Prior to the measurements, the electrolytes in two compartments are purged with high-pure  $\text{CO}_2$  gas for 1 h to reach saturation. All the potentials are converted to reversible hydrogen electrode (RHE) by the equation:  $E_{\text{RHE}} = E_{\text{Ag/AgCl}} + 0.197 + 0.0591 \times \text{pH}$ . Liquid products are analyzed by  $^1\text{H}$  NMR on Bruker DRX 400 Avance MHz spectrometers and the Faradaic efficiency (FE) of liquid sample are calculated by methods:  $\text{FEs} = 2F \times n/Q = 2F \times n/(I \times t)$ . Where n is the total amount of liquid produced (mol) and F is the Faraday constant. The Q is the total amount of charge (C), I is the total current (A) and the t is the applied time.

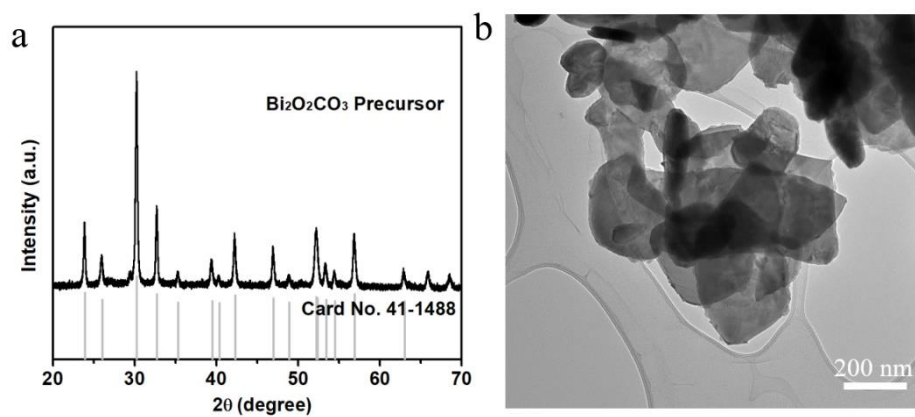

**Figure S1** The a) XRD pattern and b) TEM image of  $\text{Bi}_2\text{O}_2\text{CO}_3$  precursor.

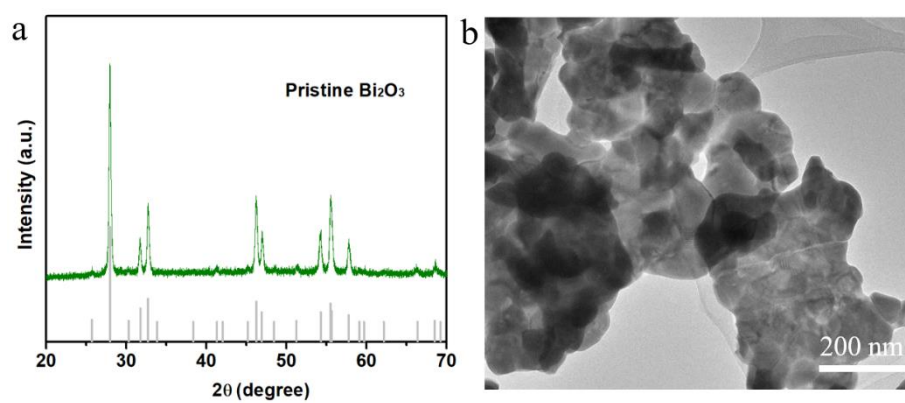

**Figure S2** The a) XRD pattern and b) TEM image of pristine  $\text{Bi}_2\text{O}_3$  sample.

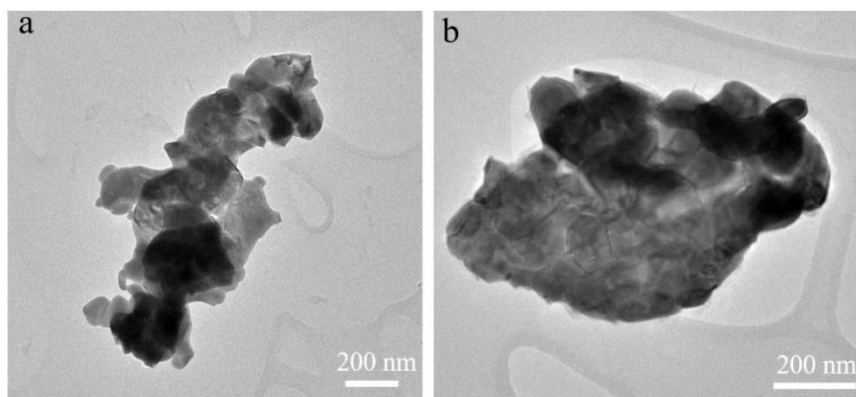

**Figure S3** The TEM images of Sn<sub>L</sub>-Bi<sub>2</sub>O<sub>3</sub> and Sn<sub>H</sub>-Bi<sub>2</sub>O<sub>3</sub> samples.

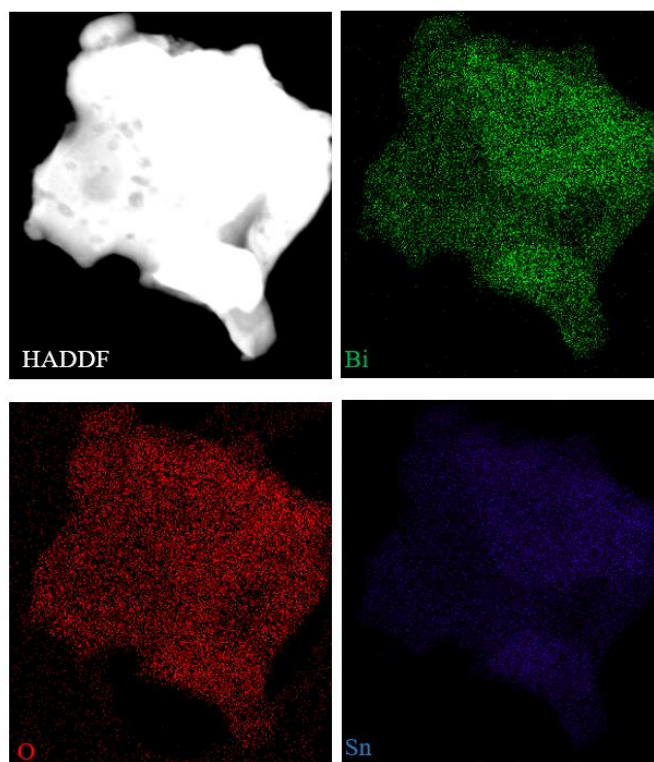

**Figure S4** The elemental mapping images of Sn<sub>L</sub>-Bi<sub>2</sub>O<sub>3</sub> product.

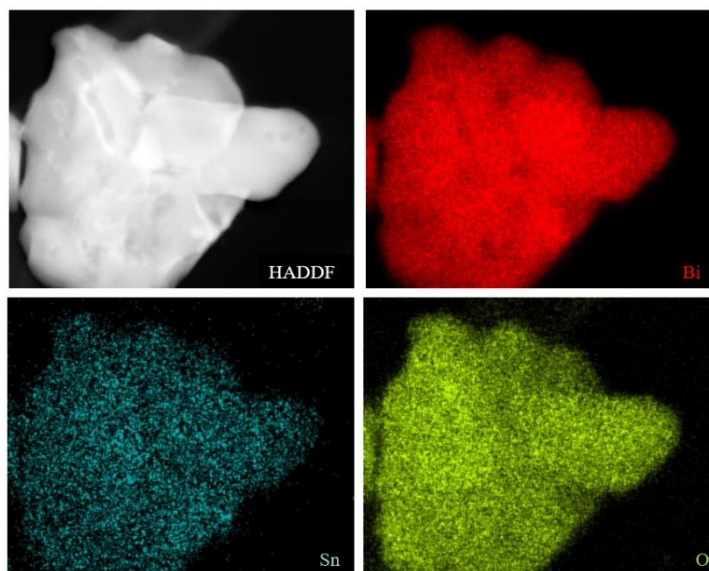

**Figure S5** The elemental mapping images of  $\text{Sn}_\text{H}\text{-Bi}_2\text{O}_3$  product.

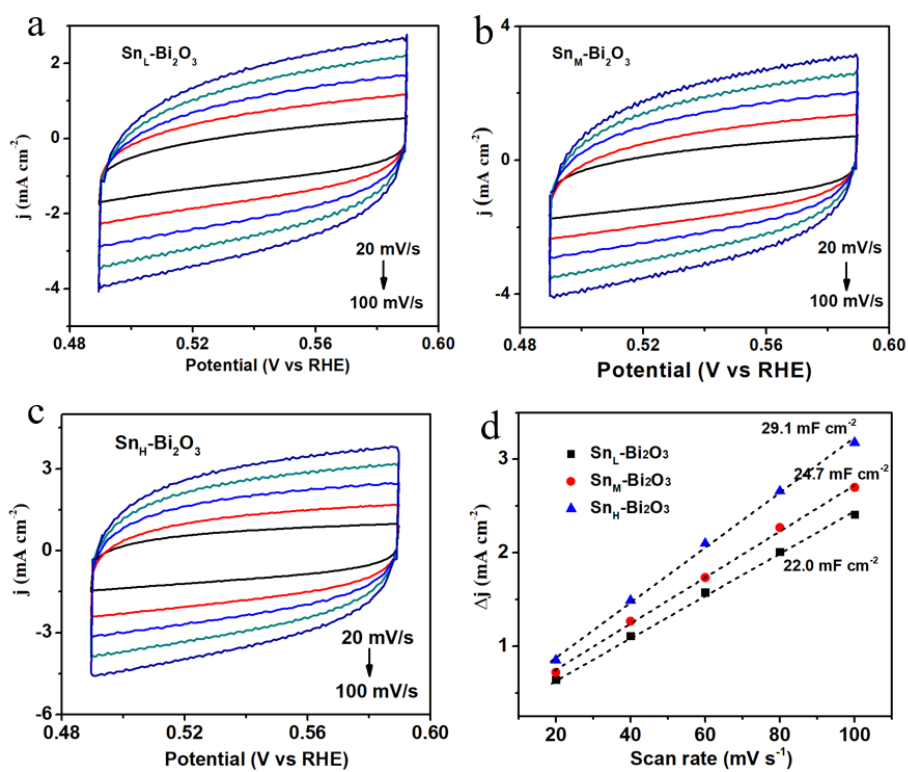

**Figure S6** The CV curves vs scan rates for a) Sn<sub>L</sub>-Bi<sub>2</sub>O<sub>3</sub>, b) Sn<sub>M</sub>-Bi<sub>2</sub>O<sub>3</sub> and c) Sn<sub>H</sub>-Bi<sub>2</sub>O<sub>3</sub> catalysts. d) The  $C_{dl}$  values for Sn<sub>L</sub>-Bi<sub>2</sub>O<sub>3</sub>, Sn<sub>M</sub>-Bi<sub>2</sub>O<sub>3</sub> and Sn<sub>H</sub>-Bi<sub>2</sub>O<sub>3</sub> catalysts.



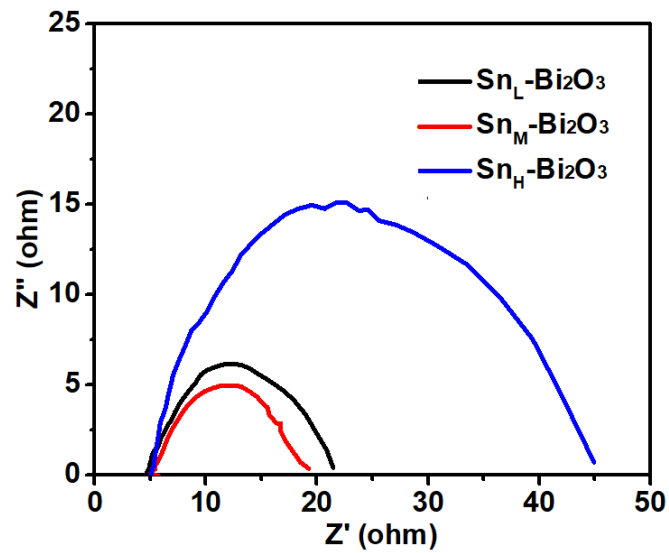

**Figure S7** The EIS spectra of  $\text{Sn}_L\text{-Bi}_2\text{O}_3$ ,  $\text{Sn}_M\text{-Bi}_2\text{O}_3$  and  $\text{Sn}_H\text{-Bi}_2\text{O}_3$ .

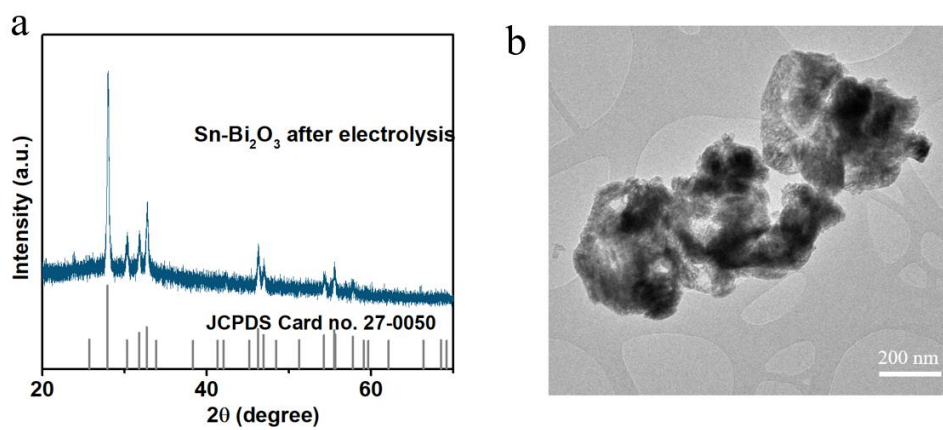

**Figure S8** The a) XRD pattern and b) TEM image of  $\text{Sn}_M\text{-Bi}_2\text{O}_3$  sample after  $\text{CO}_2$  electrolysis.

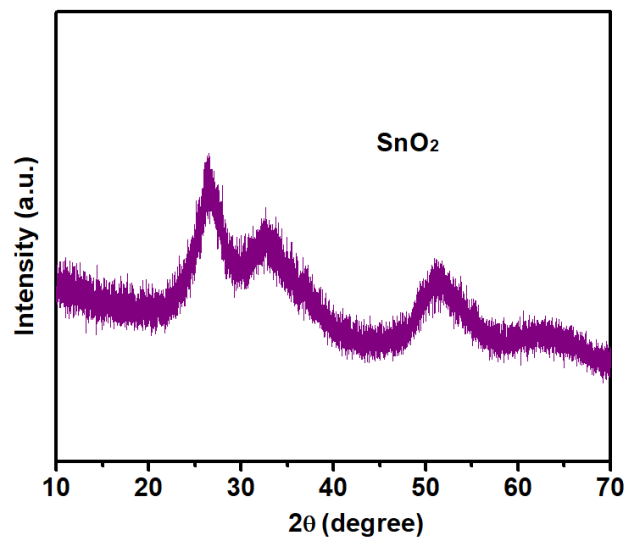

**Figure S9** The XRD pattern of SnO<sub>2</sub> sample.

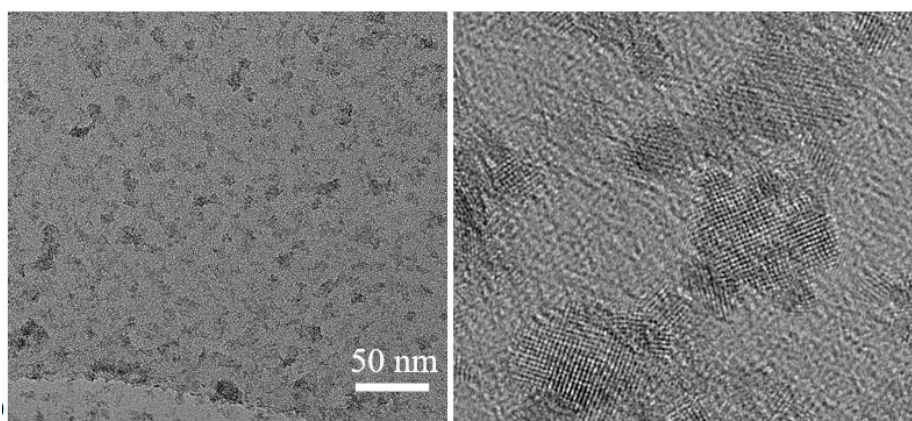

**Figure S10** The TEM and HRTEM images of SnO<sub>2</sub> sample.

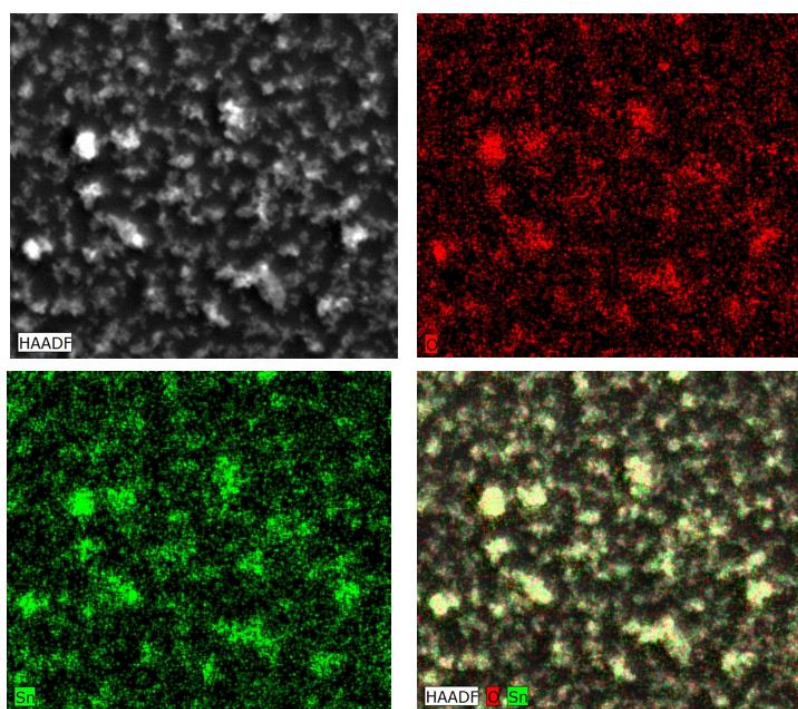

**Figure S11** The elemental mapping images of SnO<sub>2</sub> sample.

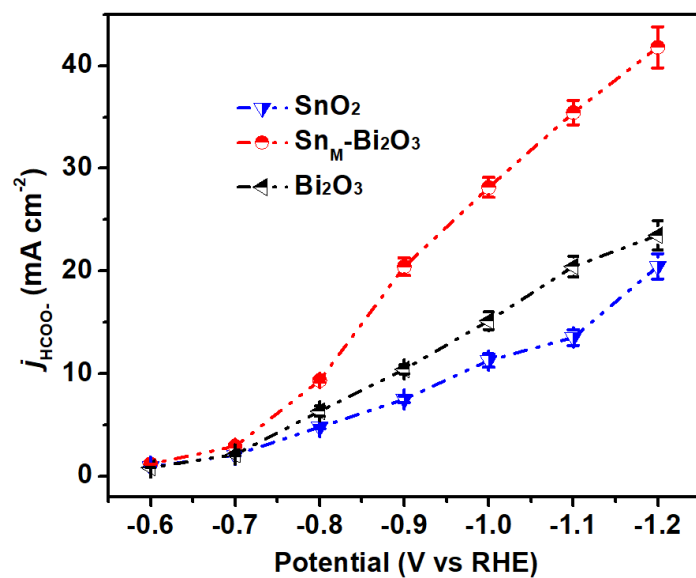

**Figure S12** The partial current density of formate at different potential of SnO<sub>2</sub>, Sn<sub>M</sub>-Bi<sub>2</sub>O<sub>3</sub> and Bi<sub>2</sub>O<sub>3</sub> catalysts.

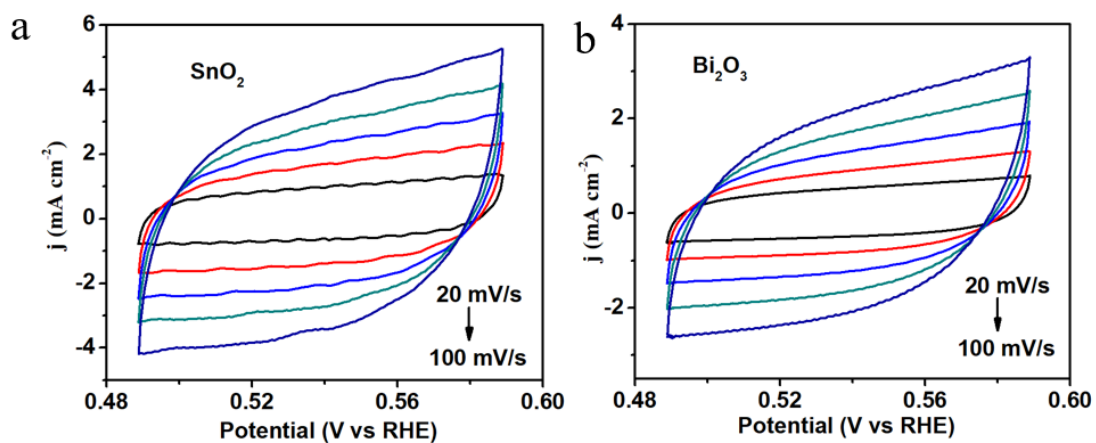

**Figure S13** The CV curves vs scan rates for a) SnO<sub>2</sub> and b) Bi<sub>2</sub>O<sub>3</sub> catalysts.

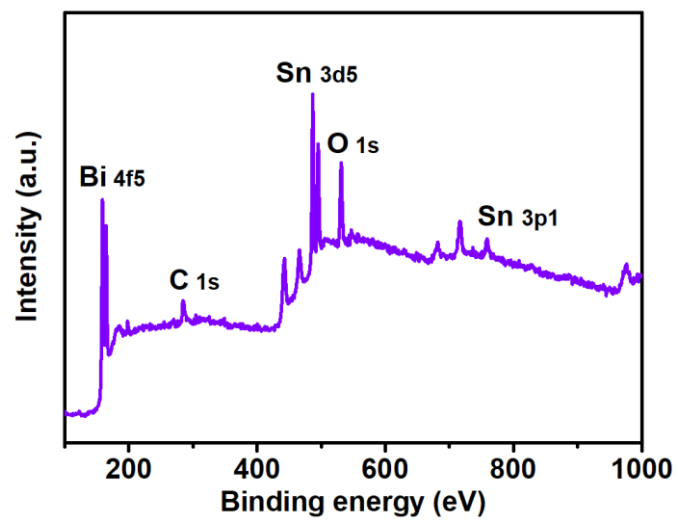

**Figure S14** The XPS survey of Sn-Bi<sub>2</sub>O<sub>3</sub> catalyst.
